# Supplementary material for: High Genotypic Diversity, Putative New Types and Intra-Genotype Variants of Bovine Papillomavirus in Northeast Brazil
Source: MDPI journal article supplement (doi:10.3390/pathogens9090748), 2020-09-15
Supplement: s1 [file s1]

**Table S1.** Total number of variants and subtypes for each BPV type identified in this study.

| BPV TYPE | VARIANTS | SUBTYPES | TOTAL |
|----------|----------|----------|-------|
| BPV1     | 1        | 0        | 1     |
| BPV2     | 5        | 2        | 7     |
| BPV4     | 1        | 0        | 1     |
| BPV5     | 0        | 2        | 2     |
| BPV11    | 4        | 0        | 4     |
| BPV13    | 3        | 0        | 3     |
| BPV14    | 1        | 0        | 1     |
| BPV24    | 1        | 0        | 1     |
| BPV25    | 8        | 0        | 8     |
| BPV26    | 6        | 4        | 10    |

**Table S2.** Mutations found in the BPV1 L1 gene sequence. The dot (.) symbolizes that the site is the same as the reference sequence.

| <b>DNA</b>         | <b>158</b> | <b>159</b> | <b>164</b> | <b>187</b> | <b>188</b> | <b>314</b> | <b>330</b> | <b>527</b> |
|--------------------|------------|------------|------------|------------|------------|------------|------------|------------|
| <b>BPV1REF</b>     | T          | C          | C          | G          | C          | G          | A          | T          |
| <b>BPVUFSBR-04</b> | A          | T          | A          | A          | A          | T          | G          | C          |
| <b>AMINO ACID</b>  | <b>53</b>  | <b>53</b>  | <b>55</b>  | <b>63</b>  | <b>63</b>  | <b>105</b> | <b>110</b> | <b>176</b> |
| <b>BPV1REF</b>     | I          | I          | A          | A          | A          | R          | G          | L          |
| <b>BPVUFSBR-04</b> | N          | N          | D          | K          | K          | I          | .          | P          |

**Table S3.** Mutations found in the BPV4 L1 gene sequences. The dot (.) symbolizes that the site is the same as the reference sequence.

| DNA         | 399 | 408 |
|-------------|-----|-----|
| BPV4REF     | T   | C   |
| BPVUFSBR-01 | G   | T   |
| BPVUFSBR-03 | .   | .   |

**Table S4.** Mutations found in the BPV5 L1 gene sequences.

| DNA         | 147 | 156 | 174 | 349 | 351 | 354 |
|-------------|-----|-----|-----|-----|-----|-----|
| BPV5REF     | C   | T   | A   | T   | G   | T   |
| BPVUFSBR-32 | T   | C   | T   | C   | C   | C   |
| BPVUFSBR-33 | T   | C   | T   | C   | C   | C   |

**Table S5.** Mutations found in the BPV11 L1 gene sequences. The dot (.) symbolizes that the site is the same as the reference sequence.

| DNA         | 327 | 566 | 588 |
|-------------|-----|-----|-----|
| BPV11REF    | A   | A   | T   |
| BPVUFSBR-13 | T   | G   | C   |
| BPVUFSBR-16 | T   | .   | C   |
| BPVUFSBR-17 | T   | .   | C   |
| BPVUFSBR-18 | T   | .   | C   |
| AMINO ACID  | 109 | 189 | 196 |
| BPV11REF    | G   | K   | G   |
| BPVUFSBR-13 | .   | R   | .   |
| BPVUFSBR-16 | .   | .   | .   |
| BPVUFSBR-17 | .   | .   | .   |
| BPVUFSBR-18 | .   | .   | .   |

**Table S6.** Mutations found in the BPV13 L1 gene sequences. The dot (.) symbolizes that the site is the same as the reference sequence.

| DNA         | 144 | 525 | 582 |
|-------------|-----|-----|-----|
| BPV13REF    | C   | G   | A   |
| BPVUFSBR-14 | T   | A   | C   |
| BPVUFSBR-15 | T   | A   | C   |
| BPVUFSBR-29 | T   | .   | C   |

**Table S7.** Mutations found in the BPV14 L1 gene sequences. The dot (.) symbolizes that the site is the same as the reference sequence.

| <b>DNA</b>         | <b>659</b> | <b>668</b> | <b>681</b> |
|--------------------|------------|------------|------------|
| <b>BPV14REF</b>    | A          | T          | T          |
| <b>BPVUFSBR-12</b> | C          | A          | C          |
| <b>AMINO ACID</b>  | <b>220</b> | <b>223</b> | <b>227</b> |
| <b>BPV14REF</b>    | H          | I          | D          |
| <b>BPVUFSBR-12</b> | P          | K          | .          |

**Table S8.** Mutations found in the BPV24 L1 gene sequences. The dot (.) symbolizes that the site is the same as the reference sequence.

| DNA         | 339 | 394 | 395 | 417 |
|-------------|-----|-----|-----|-----|
| BPV24REF    | T   | A   | A   | T   |
| BPVUFSBR-35 | A   | G   | G   | A   |
| AMINO ACID  | 113 | 132 | 132 | 139 |
| BPV24REF    | G   | N   | N   | D   |
| BPVUFSBR-35 | .   | G   | G   | E   |



**Table S9.** Mutations found in the BPV25 L1 gene sequences. The dot (.) symbolizes that that site is the same as the reference sequence. The hyphen (-) symbolizes a non-sequenced site.

| DNA         | 135 | 502 | 579 |
|-------------|-----|-----|-----|
| BPV25REF    | A   | G   | A   |
| BPVUFSBR-40 | G   | C   | C   |
| BPVUFSBR-41 | G   | C   | C   |
| BPVUFSBR-42 | G   | C   | C   |
| BPVUFSBR-43 | G   | C   | C   |
| BPVUFSBR-46 | G   | C   | C   |
| BPVUFSBR-50 | G   | C   | C   |
| BPVUFSBR-51 | G   | C   | C   |
| BPVUFSBR-52 | G   | -   | -   |
| AMINO ACID  | 45  | 168 | 193 |
| BPV25REF    | V   | A   | G   |
| BPVUFSBR-40 | .   | P   | .   |
| BPVUFSBR-41 | .   | P   | .   |
| BPVUFSBR-42 | .   | P   | .   |
| BPVUFSBR-43 | .   | P   | .   |
| BPVUFSBR-46 | .   | P   | .   |
| BPVUFSBR-50 | .   | P   | .   |
| BPVUFSBR-51 | .   | P   | .   |
| BPVUFSBR-52 | .   | -   | -   |



**Table S11.** Mutations found in the BPV26 L1 gene sequences. The dot (.) symbolizes that that site is the same as the reference sequence. The hyphen (-) symbolizes a non-sequenced site.

| DNA         | 147 | 156 | 157 | 170 | 177 | 192 | 201 | 217 | 219 | 234 | 237 |
|-------------|-----|-----|-----|-----|-----|-----|-----|-----|-----|-----|-----|
| BPV26REF    | A   | T   | T   | C   | A   | T   | C   | A   | G   | C   | T   |
| BPVUFSBR-21 | .   | .   | .   | G   | .   | .   | .   | .   | .   | .   | .   |
| BPVUFSBR-22 | .   | .   | .   | G   | .   | .   | .   | .   | .   | .   | .   |
| BPVUFSBR-23 | .   | .   | .   | G   | .   | .   | .   | .   | .   | .   | .   |
| BPVUFSBR-24 | .   | .   | .   | G   | .   | .   | .   | .   | .   | .   | .   |
| BPVUFSBR-25 | .   | .   | .   | G   | .   | .   | .   | .   | .   | .   | .   |
| BPVUFSBR-26 | .   | .   | .   | G   | .   | .   | .   | .   | .   | .   | .   |
| BPVUFSBR-27 | G   | .   | .   | G   | .   | C   | T   | .   | .   | T   | .   |
| BPVUFSBR-37 | .   | C   | C   | G   | T   | .   | T   | C   | A   | .   | A   |
| BPVUFSBR-38 | .   | C   | C   | G   | T   | .   | T   | C   | A   | .   | A   |
| BPVUFSBR-39 | .   | C   | C   | G   | T   | .   | T   | C   | A   | .   | A   |
| AMINO ACID  | 49  | 52  | 53  | 57  | 59  | 64  | 67  | 73  | 73  | 78  | 79  |
| BPV26REF    | P   | D   | L   | A   | T   | V   | S   | R   | R   | D   | P   |
| BPVUFSBR-21 | -   | .   | .   | G   | .   | .   | .   | .   | .   | .   | .   |
| BPVUFSBR-22 | .   | .   | .   | G   | .   | .   | .   | .   | .   | .   | .   |
| BPVUFSBR-23 | .   | .   | .   | G   | .   | .   | .   | .   | .   | .   | .   |
| BPVUFSBR-24 | .   | .   | .   | G   | .   | .   | .   | .   | .   | .   | .   |
| BPVUFSBR-25 | .   | .   | .   | G   | .   | .   | .   | .   | .   | .   | .   |
| BPVUFSBR-26 | .   | .   | .   | G   | .   | .   | .   | .   | .   | .   | .   |
| BPVUFSBR-27 | .   | .   | .   | G   | .   | .   | .   | .   | .   | .   | .   |
| BPVUFSBR-37 | .   | .   | .   | G   | .   | .   | .   | .   | .   | .   | .   |
| BPVUFSBR-38 | .   | .   | .   | G   | .   | .   | .   | .   | .   | .   | .   |
| BPVUFSBR-39 | .   | .   | .   | G   | .   | .   | .   | .   | .   | .   | .   |

**Table S11.** (Continuation) Mutations found in the BPV26 L1 gene sequences. The dot (.) symbolizes that that site is the same as the reference sequence. The hyphen (-) symbolizes a non-sequenced site.

[illegible]

**Table S11.** (Continuation) Mutations found in the BPV26 L1 gene sequences. The dot (.) symbolizes that that site is the same as the reference sequence. The hyphen (-) symbolizes a non-sequenced site.

[illegible]

**Table S11.** (Continuation) Mutations found in the BPV26 L1 gene sequences. The dot (.) symbolizes that that site is the same as the reference sequence. The hyphen (-) symbolizes a non-sequenced site.

[illegible]

**Table S12.** GenBank accession number of the sequences obtained in this study.

| BPV ISOLATE | GENBANK ACCESSION NUMBER |
|-------------|--------------------------|
| BPVUFSBR-01 | MT674570                 |
| BPVUFSBR-02 | MT674571                 |
| BPVUFSBR-03 | MT674572                 |
| BPVUFSBR-04 | MT674573                 |
| BPVUFSBR-05 | MT674574                 |
| BPVUFSBR-06 | MT674575                 |
| BPVUFSBR-07 | MT674576                 |
| BPVUFSBR-08 | MT674577                 |
| BPVUFSBR-09 | MT674578                 |
| BPVUFSBR-10 | MT674579                 |
| BPVUFSBR-11 | MT674580                 |
| BPVUFSBR-12 | MT674581                 |
| BPVUFSBR-13 | MT674582                 |
| BPVUFSBR-14 | MT674583                 |
| BPVUFSBR-15 | MT674584                 |
| BPVUFSBR-16 | MT674585                 |
| BPVUFSBR-17 | MT674586                 |
| BPVUFSBR-18 | MT674587                 |
| BPVUFSBR-19 | MT674588                 |
| BPVUFSBR-20 | MT674589                 |
| BPVUFSBR-21 | MT674590                 |
| BPVUFSBR-22 | MT674591                 |
| BPVUFSBR-23 | MT674592                 |
| BPVUFSBR-24 | MT674593                 |
| BPVUFSBR-25 | MT674594                 |
| BPVUFSBR-26 | MT674595                 |
| BPVUFSBR-27 | MT674596                 |
| BPVUFSBR-28 | MT674597                 |
| BPVUFSBR-29 | MT674598                 |
| BPVUFSBR-30 | MT674599                 |
| BPVUFSBR-31 | MT674600                 |
| BPVUFSBR-32 | MT674601                 |
| BPVUFSBR-33 | MT674602                 |
| BPVUFSBR-34 | MT674603                 |
| BPVUFSBR-35 | MT674604                 |
| BPVUFSBR-36 | MT674605                 |
| BPVUFSBR-37 | MT674606                 |
| BPVUFSBR-38 | MT674607                 |
| BPVUFSBR-39 | MT674608                 |
| BPVUFSBR-40 | MT674609                 |
| BPVUFSBR-41 | MT674610                 |
| BPVUFSBR-42 | MT674611                 |
| BPVUFSBR-43 | MT674612                 |
| BPVUFSBR-44 | MT674613                 |
| BPVUFSBR-45 | MT674614                 |
| BPVUFSBR-46 | MT674615                 |
| BPVUFSBR-47 | MT674616                 |
| BPVUFSBR-48 | MT674617                 |
| BPVUFSBR-49 | MT674618                 |
| BPVUFSBR-50 | MT674619                 |
| BPVUFSBR-51 | MT674620                 |
| BPVUFSBR-52 | MT674621                 |
